# Supplementary material
Source: PubMed Central journal article supplement (PMC4060044)
Supplement: NIHMS29861-supplement-Supporting_information.pdf [file NIHMS29861-supplement-Supporting_information.pdf]

## SUPPLEMENTARY DATA

### **Lysophosphatidic acid receptor activation affects the C13NJ microglia cell line proteome leading to alterations in glycolysis, motility, and cytoskeletal architecture**

Eva Bernhart, Manfred Kollroser, Gerald Rechberger, Helga Reicher, Akos Heinemann, Petra Schratl, Seth Hallström, Andrea Wintersperger, Christoph Nusshold, Trevor DeVaney, Klaus Zorn-Pauly, Roland Malli, Wolfgang Graier, Ernst Malle, and Wolfgang Sattler

#### **Fig. 1: 2D-DIGE images of fluorescently labeled proteins from control and LPA-treated C13NJ microglia**

Cells were plated on 12-cm Petri dishes and incubated as described in 'Materials and Methods' in the absence or presence of LPA (2  $\mu$ M). After 6 h incubation, proteins extracted from untreated and LPA-treated cells were labeled with Cy5 (control; A) or Cy3 (LPA treated; B) and separated on pH 3-10 IPG strips in the first dimension. The second dimension was run on 12% SDS-PAGE gels and scanned with a Typhoon 9400 fluorescent scanner. In the overlay shown in (C) spots regulated  $\geq 2$ -fold are numbered as in Table 2.

Fig. I A,B

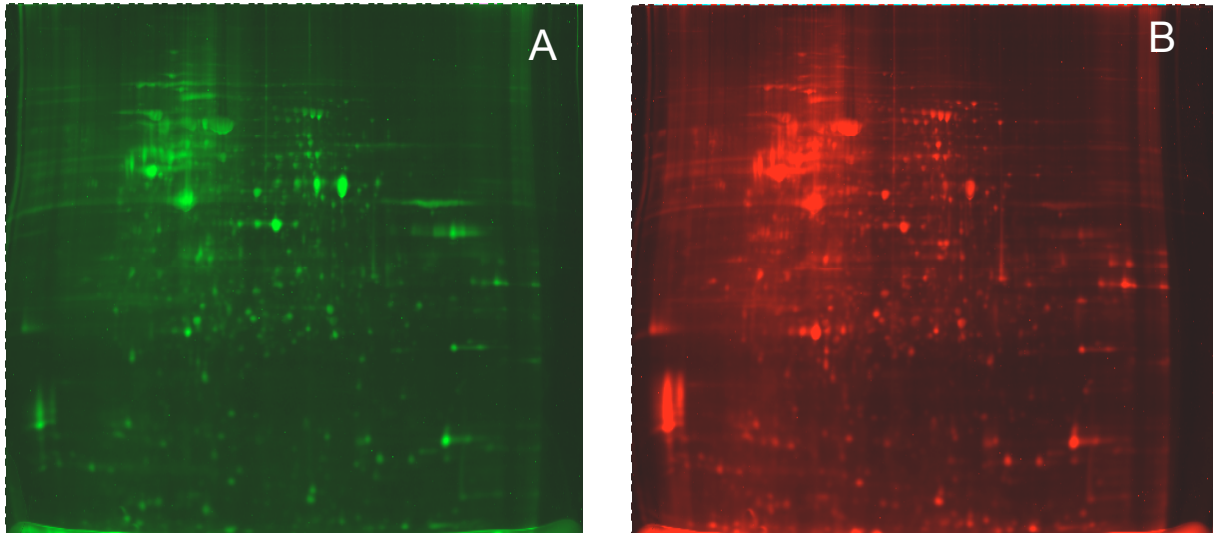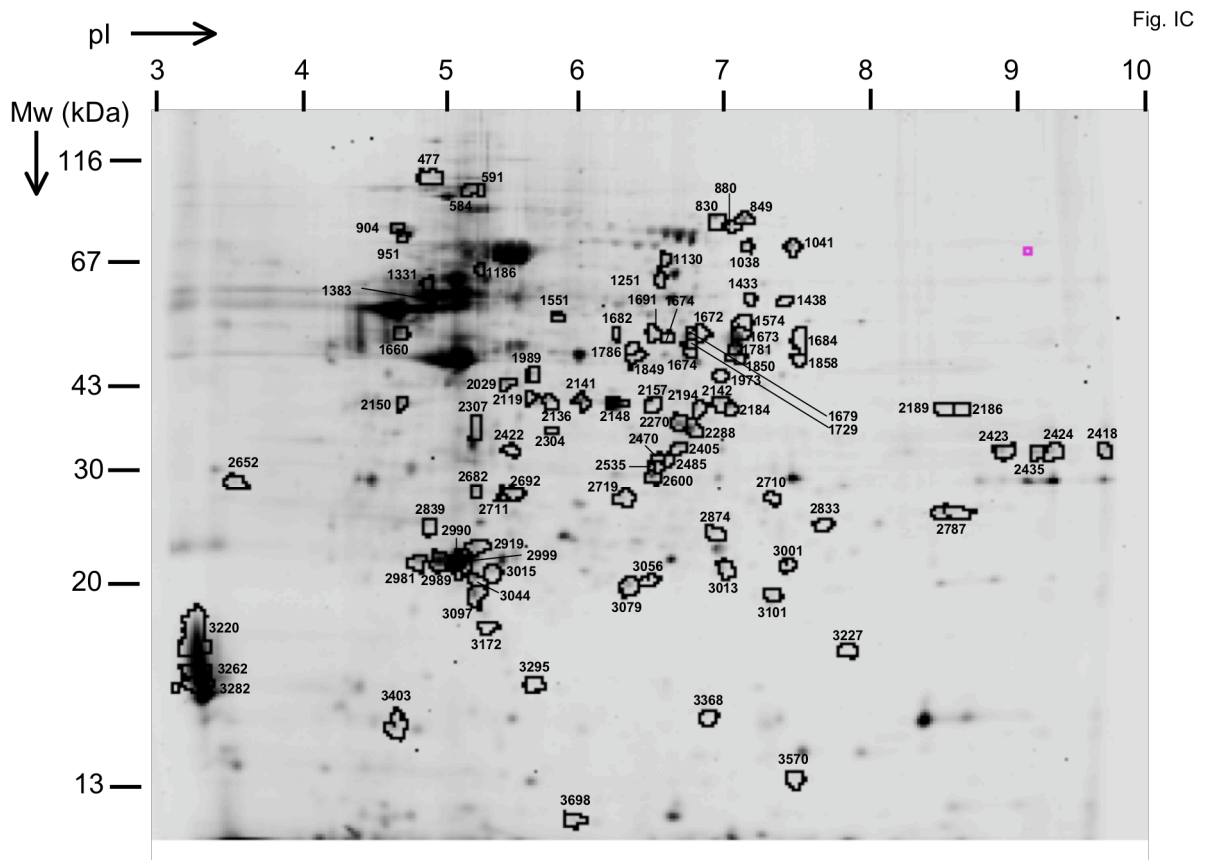

Fig. IC
